# Supplementary material for: Graph‐Based Analysis of RNA Secondary Structure Similarity Comparison
Source: Hindawi journal article supplement (doi:10.1155/2021/8841822), 2021-01-01
Supplement: f1 [file 8841822.f1.docx]

## Supplementary Materials

Supplementary Figure S1: The cluster analysis graph of 100 non-coding RNA sequences generated by Li’s method.

Supplementary Figure S2: The cluster analysis graph of 100 non-coding RNA sequences generated by *RNApdist*.

Supplementary Figure S3: The cluster analysis graph of 100 non-coding RNA sequences generated by *ASPRAlign*.
